# Supplementary material
Source: PubMed Central journal article supplement (PMC7414896)
Supplement: NIHMS613691-supplement-JNE496288suppdata_pdf.pdf [file NIHMS613691-supplement-JNE496288suppdata_pdf.pdf]

**Supplementary Table 1.** A summary of the results from the multiple regression performed on how cortical responses varied with ICC stimulation location.

LFP area and DSR recorded within layers I-V of A1 in response to co-activation across an ICC isofrequency lamina (see figures 6 and 7 for ICC locations). For each stimulation location, cortical activity was averaged across recording locations. The angle  $\theta$  across the isofrequency lamina is the inverse tangent of the slope of the regression, where  $90^\circ$  would be aligned to the caudal to rostral axis and  $0^\circ$  would be aligned to the medial to lateral axis. Each regression was performed on the number of ICC site pairs N, with the descriptive statistics of a coefficient of determination  $R^2$  and probability P.

|                            |                       | 0 ms IPI | 0.5 ms IPI | 1 ms IPI | 2 ms IPI | 4 ms IPI | 8 ms IPI |
|----------------------------|-----------------------|----------|------------|----------|----------|----------|----------|
| LFP Layer I/II<br>(N=28)   | $R^2$                 | 0.43     | 0.30       | 0.34     | 0.17     | 0.05     | 0.03     |
|                            | P                     | 0.001    | 0.025      | 0.005    | 0.096    | 0.515    | 0.704    |
|                            | $\theta$ ( $^\circ$ ) | 75.5     | 90.9       | 102.8    | 112.4    | 99.9     | 147.4    |
| LFP Layer III/IV<br>(N=28) | $R^2$                 | 0.57     | 0.39       | 0.16     | 0.01     | 0.03     | 0.01     |
|                            | P                     | 0.000    | 0.007      | 0.129    | 0.940    | 0.688    | 0.843    |
|                            | $\theta$ ( $^\circ$ ) | 34.3     | 54.6       | 86.4     | 169.3    | 31.0     | 166.3    |
| LFP Layer V<br>(N=25)      | $R^2$                 | 0.51     | 0.41       | 0.35     | 0.10     | 0.07     | 0.09     |
|                            | P                     | 0.00     | 0.01       | 0.01     | 0.32     | 0.43     | 0.37     |
|                            | $\theta$ ( $^\circ$ ) | 62.3     | 79.6       | 96.0     | 98.1     | 58.9     | 55.4     |
| DSR Layer I/II<br>(N=25)   | $R^2$                 | 0.29     | 0.31       | 0.18     | 0.12     | 0.10     | 0.08     |
|                            | P                     | 0.023    | 0.035      | 0.106    | 0.232    | 0.306    | 0.401    |
|                            | $\theta$ ( $^\circ$ ) | 85.5     | 96.1       | 95.9     | 101.4    | 82.0     | 105.4    |
| DSR Layer III/IV<br>(N=27) | $R^2$                 | 0.24     | 0.22       | 0.08     | 0.02     | 0.10     | 0.19     |
|                            | P                     | 0.035    | 0.078      | 0.354    | 0.757    | 0.296    | 0.078    |
|                            | $\theta$ ( $^\circ$ ) | 49.5     | 79.0       | 103.6    | 152.5    | 146.1    | 14.2     |
